# Supplementary material for: Associations between fundamental movement skills and accelerometer-measured physical activity in Chinese children: the mediating role of cardiorespiratory fitness
Source: PeerJ. 2024 Jun 24;12:e17564. doi: 10.7717/peerj.17564 (PMC11210481; doi:10.7717/peerj.17564)
Supplement: Supplemental Information 5 [file peerj-12-17564-s005.xlsx]

## Sheet: Sheet1
Sex	Age	Weight(cm)	Height	BMI	MVPA	LS	OCS	FMS	CRF
2	6	155.5	46.1	19.07	53.6	29	35	64	16
1	6	151	40.3	17.67	49.5	39	47	86	46
2	6	161.4	56.2	21.57	49.31	31	40	71	28
1	6	146.4	46.5	21.7	42.77	42	45	87	40
1	6	137.7	35.7	18.83	41.83	32	40	72	36
1	6	146.5	47.4	22.09	41.62	30	37	67	18
1	6	160.1	48.6	18.96	40.98	38	42	80	29
2	6	158.7	50.2	19.93	37.01	37	42	79	29
2	6	157.5	42.6	17.17	36.79	31	43	74	35
1	6	154.1	48.3	20.34	35.63	39	37	76	36
2	6	146.5	45	20.97	34.39	34	33	67	22
1	6	141.6	30.2	15.06	34.14	37	46	83	39
2	6	157	39	15.82	32.45	42	40	82	42
2	6	138.9	33.1	17.16	26.58	33	29	62	34
2	6	148.9	31.6	14.25	25.95	43	38	81	19
2	6	145.6	35.5	16.75	25.86	39	41	80	31
1	6	149	32.5	14.64	22.47	40	43	83	18
2	6	153.3	39.2	16.68	21.57	36	36	72	31
2	6	155.5	46.2	19.11	21.33	40	37	77	24
2	6	152	42	18.18	17.1	46	40	86	34
2	6	149.5	34.8	15.57	15.36	38	40	78	19
2	6	146.3	29.5	13.78	11.23	37	36	73	23
1	5	147.5	42.6	19.58	73.68	40	42	82	34
1	5	143.3	42.4	20.65	63.8	40	46	86	41
1	5	145.3	38.2	18.09	63.22	42	46	88	31
1	5	147.1	45.2	20.89	51.42	41	45	86	23
1	5	153.5	28.6	12.14	48.25	24	32	56	18
1	5	137.5	30	15.87	48.18	38	34	72	20
1	5	141	33	16.6	44.93	40	38	78	32
2	5	146.7	35	16.26	44.4	42	42	84	21
1	5	140.1	37.1	18.9	43.33	31	42	73	22
1	5	148.5	42.1	19.09	41.02	40	32	72	42
1	5	144.7	49.6	23.69	40.01	39	39	78	33
1	5	142.1	34.6	17.14	39.59	30	40	70	42
1	5	149.7	34.5	15.39	39.43	41	41	82	37
1	5	143.4	40.6	19.74	39.37	41	44	85	23
1	5	142.9	46	22.53	37.88	40	45	85	23
1	5	149.3	50.7	22.75	36.96	35	37	72	17
1	5	145.7	54.5	25.67	36.87	31	37	68	15
1	5	159	40.5	16.02	36.56	33	38	71	30
2	5	150.6	35	15.43	35.95	39	38	77	43
1	5	140.2	27	13.74	35.93	42	45	87	33
2	5	142.7	32.5	15.96	34.81	37	43	80	26
1	5	159.4	59.3	23.34	34.76	35	44	79	18
2	5	137.4	28.8	15.26	34.52	40	41	81	25
2	5	142.6	38.9	19.13	34.34	40	38	78	34
2	5	149.1	43.2	19.43	34.3	36	36	72	20
1	5	146.5	40	18.64	33.8	36	35	71	28
2	5	149.3	32.3	14.49	33.77	36	32	68	20
1	5	133.8	39.1	21.84	33.55	43	44	87	28
1	5	145.1	49	23.27	33.34	38	42	80	26
2	5	138	26.5	13.92	33.09	36	32	68	22
1	5	154	50.8	21.42	31.92	38	44	82	16
2	5	143.7	36.5	17.68	31.62	39	38	77	19
1	5	136.3	38.4	20.67	30.88	36	34	70	24
1	5	137.5	28	14.81	30.69	42	38	80	40
1	5	146.3	46.8	21.87	30.65	40	45	85	23
1	5	144.1	51.2	24.66	29.64	24	32	56	8
1	5	139.6	35.6	18.27	29.21	43	38	81	22
1	5	146.6	49.2	22.89	28.6	40	38	78	10
1	5	152	61.5	26.62	27.02	29	40	69	13
2	5	143.2	39.9	19.46	26.22	39	37	76	32
1	5	158.1	61.1	24.44	25.86	34	31	65	16
1	5	148.5	48.3	21.9	25.03	42	42	84	23
2	5	147.4	36.9	16.98	24.38	35	32	67	33
2	5	144.6	31.6	15.11	23.84	36	43	79	27
2	5	140.6	40.9	20.69	23.82	29	36	65	18
2	5	147.2	42.9	19.8	23.6	42	36	78	17
1	5	154.1	48.5	20.42	22.71	41	36	77	34
2	5	147.3	33.6	15.49	22.59	42	35	77	25
1	5	138.9	44.5	23.07	20.49	40	41	81	17
2	5	146.6	44.7	20.8	19.81	39	27	66	15
2	5	149.5	34	15.21	19.52	37	39	76	23
1	5	154.7	45.5	19.01	19.19	36	33	69	35
2	5	150.8	34.7	15.26	19.13	41	32	73	19
2	5	142.7	38	18.66	16.65	37	43	80	25
1	5	135.6	32.3	17.57	16.2	40	39	79	15
2	5	141	28.5	14.34	14.31	37	26	63	25
2	5	141.9	36.6	18.18	40.39	38	34	72	19
2	5	135.8	29.5	16	39.17	29	37	66	16
2	5	150.5	36.2	15.98	26.57	32	31	63	7
1	5	146.5	41.5	19.34	22.88	36	36	72	8
1	5	152.5	49.1	21.11	22.56	40	38	78	13
2	5	130.8	26.7	15.61	22.53	36	34	70	17
2	5	155	44	18.31	20.21	38	33	71	8
2	5	153	74	31.61	18.74	34	40	74	11
2	5	140.5	32	16.21	7.09	33	31	64	16
1	5	140.5	31.1	15.75	29.71	35	41	76	19
1	5	137.5	30.7	16.24	25.27	34	28	62	22
1	4	159.1	58.7	23.19	66.95	43	42	85	25
1	4	137	45.3	24.14	55.77	37	43	80	7
1	4	154.9	44	18.34	55.56	35	38	73	29
1	4	151.3	57.2	24.99	40.6	40	44	84	18
2	4	141.1	36.1	18.13	33.8	38	41	79	25
2	4	139.4	31	15.95	32.07	35	45	80	33
2	4	136.9	37.1	19.8	27.93	35	37	72	24
2	4	143.4	30.8	14.98	24.17	39	47	86	39
1	4	147.6	51.2	23.5	22.27	37	38	75	19
2	4	145	35	16.65	20.86	40	42	82	20
1	4	142	33.2	16.46	76.86	43	44	87	46
1	4	143.5	35.6	17.29	70.6	42	45	87	25
1	4	142.3	29.6	14.62	57.38	40	46	86	23
1	4	131	27.7	16.14	57.25	32	36	68	41
1	4	149	39.8	17.93	54.31	36	34	70	32
1	4	145	38	18.07	49.15	38	40	78	39
1	4	148.5	50.7	22.99	45.7	36	43	79	18
2	4	143.9	51.5	24.87	44.99	36	38	74	11
1	4	144	45.3	21.85	44.26	36	40	76	12
2	4	145	37.6	17.88	42.06	34	31	65	18
2	4	148	47.5	21.69	39.44	41	38	79	19
1	4	144	52.8	25.46	38.53	30	33	63	16
1	4	144	46.5	22.42	38.4	39	45	84	17
1	4	139.5	30.7	15.78	38.29	40	37	77	22
2	4	148.9	44.3	19.98	38.18	29	33	62	23
1	4	143	49.7	24.3	36.99	40	44	84	21
1	4	133.7	34.2	19.13	36.41	33	43	76	26
1	4	145	44	20.93	34.87	37	40	77	13
1	4	139	32.1	16.61	34.55	29	33	62	12
2	4	136	33	17.84	34.29	39	30	69	28
1	4	140	38.1	19.44	33.93	32	28	60	17
2	4	139	30.4	15.73	33.7	33	34	67	17
1	4	145.7	47.2	22.23	33.52	40	35	75	11
1	4	146	47.9	22.47	32.5	37	39	76	18
1	4	138.5	30.6	15.95	31.89	40	36	76	21
2	4	138	28.8	15.12	31.76	39	39	78	30
2	4	145.5	38.1	18	31.61	40	30	70	22
1	4	148.5	49.2	22.31	31.11	35	40	75	19
1	4	135.5	34.5	18.79	30.87	44	37	81	20
1	4	138	28.7	15.07	29.7	39	35	74	24
2	4	144.7	39.6	18.91	29.12	32	39	71	12
1	4	139	33.7	17.44	28.67	35	43	78	18
2	4	136	34.6	18.71	28.62	40	36	76	21
2	4	144.8	96.6	46.07	28.04	31	40	71	22
1	4	141.8	44.3	22.03	27.33	32	46	78	11
2	4	148.5	36.6	16.6	26.64	41	36	77	20
2	4	146	50	23.46	26.33	36	32	68	19
1	4	137.5	36.6	19.36	25.95	32	26	58	12
1	4	139	41.8	21.63	25.23	38	42	80	17
2	4	147	44.8	20.73	25.08	42	34	76	27
2	4	139	29.9	15.48	24.83	39	39	78	25
2	4	139	29.4	15.22	24.59	40	33	73	22
1	4	146	46.7	21.91	24.51	36	45	81	22
1	4	135	33.3	18.27	24.37	35	41	76	20
2	4	129	30.9	18.57	24	41	39	80	27
2	4	145.5	33.1	15.64	24	40	41	81	12
2	4	135.5	30.9	16.83	23.85	44	35	79	35
2	4	138.5	34.7	18.09	23.84	24	37	61	11
1	4	142	61	30.25	23.6	30	30	60	7
2	4	140	51.9	26.48	23.02	27	36	63	11
2	4	159	48.7	19.26	22.28	27	33	60	20
1	4	147.5	39.8	18.29	21.09	37	31	68	32
1	4	140	34.9	17.81	20.65	37	36	73	21
2	4	143	41.8	20.44	20.58	36	38	74	15
1	4	141.2	42.6	21.37	20.43	30	37	67	15
2	4	137	36.4	19.39	16.39	36	34	70	15
2	4	150	35.3	15.69	15.92	33	33	66	12
1	4	144.5	33.7	16.14	15.58	41	38	79	16
2	4	142	32.1	15.92	13.78	32	27	59	12
2	4	137	30.1	16.04	13.45	27	19	46	9
2	4	133.5	27.5	15.43	94.39	42	38	80	32
2	4	134	27.2	15.15	67.78	41	35	76	34
2	4	134.8	30.5	16.78	62.57	38	30	68	28
1	4	150.2	40.6	18	60.83	24	35	59	24
1	4	139	41	21.22	56.36	40	38	78	21
2	4	132.8	29.7	16.84	53.26	40	32	72	22
1	4	146	42.8	20.08	50.66	33	28	61	29
2	4	129.3	24.5	14.65	47.77	39	40	79	21
2	4	136.4	28.6	15.37	45.29	40	36	76	17
1	4	142.1	42.4	21	44.41	35	44	79	31
2	4	125.4	25.7	16.34	43.89	33	36	69	16
2	4	144.6	29.6	14.16	43.71	39	35	74	19
1	4	127.7	30.4	18.64	43.02	35	44	79	20
2	4	134.7	38.1	21	42.29	39	33	72	16
2	4	142.3	26.2	12.94	41.87	43	34	77	23
1	4	141.6	49.1	24.49	41.32	38	39	77	18
2	4	138.4	27.7	14.46	40.62	36	33	69	27
1	4	144.6	33.9	16.21	39.34	29	28	57	12
2	4	143.1	29.9	14.6	38.12	34	32	66	16
2	4	137	28.7	15.29	37.66	39	40	79	24
1	4	129.3	28	16.75	37.04	30	42	72	21
2	4	130.9	22.8	13.31	36.01	38	39	77	16
2	4	137.3	31	16.44	35.22	43	36	79	17
2	4	129.1	24.5	14.7	34.81	38	35	73	10
1	4	129.8	32.3	19.17	34.42	37	39	76	29
2	4	141.8	47	23.37	34.3	28	35	63	19
1	4	134.7	32.2	17.75	33.53	38	42	80	21
1	4	140.5	40.4	20.47	33.52	29	38	67	8
1	4	144	34.2	16.49	33.41	35	36	71	10
1	4	134.7	27.5	15.16	33.4	35	44	79	28
2	4	148.5	34.5	15.64	33.16	34	30	64	28
1	4	132.5	34.6	19.71	33.06	28	37	65	15
1	4	136.8	37.9	20.25	32.96	36	35	71	11
2	4	140.1	37.1	18.9	32.83	29	34	63	11
1	4	141	44.5	22.38	31.94	39	33	72	17
1	4	136.9	39	20.81	31.68	28	35	63	12
2	4	131.8	35.6	20.49	31.58	33	32	65	15
1	4	138	40.3	21.16	30.43	23	36	59	16
1	4	133.2	37.6	21.19	30.13	34	33	67	16
2	4	142	33.2	16.46	30.12	37	35	72	17
2	4	127.7	23.2	14.23	29.22	32	37	69	24
2	4	131.4	33	19.11	29.2	33	34	67	16
2	4	141.6	31.8	15.86	29.02	38	42	80	18
2	4	145	42.4	20.17	27.63	39	32	71	19
1	4	139.6	55.2	28.32	26.86	36	42	78	19
2	4	129	21.4	12.86	26.65	42	29	71	13
1	4	132.5	31.7	18.06	25.22	38	40	78	29
2	4	139.9	33.5	17.12	24.63	33	34	67	25
1	4	128.8	24.5	14.77	24.6	36	38	74	16
1	4	152	40.7	17.62	24.48	43	40	83	44
2	4	131.6	28	16.17	22.63	38	41	79	20
1	4	138.8	42.6	22.11	21.75	31	27	58	19
1	4	137.5	32.8	17.35	20.8	33	36	69	21
1	4	137.6	31.8	16.8	20.76	33	36	69	23
2	4	132.2	28	16.02	20.74	27	33	60	10
1	4	142.7	36.6	17.97	19.89	37	45	82	22
2	4	140.7	39.8	20.1	19.53	31	32	63	10
2	4	132	23.5	13.49	18.13	30	35	65	17
2	3	147.2	37.9	17.49	32.64	38	41	79	15
1	3	136.3	38.3	20.62	72.15	34	42	76	32
1	3	143.2	45.1	21.99	47	35	43	78	18
1	3	142	31.7	15.72	42.71	37	38	75	21
1	3	137	37.4	19.93	40.57	36	39	75	16
2	3	128	25.8	15.75	35.7	41	38	79	20
2	3	137	42.6	22.7	35.54	37	30	67	23
1	3	130.5	27.6	16.21	33.69	30	30	60	12
1	3	136	31.6	17.08	32.94	36	39	75	29
2	3	152.5	48.5	20.85	26.22	29	21	50	11
2	3	139.5	34.6	17.78	24.76	41	42	83	23
2	3	145	37.8	17.98	17.01	36	33	69	16
1	3	137.6	32	16.9	79.2	38	38	76	15
1	3	133.9	26.8	14.95	78.31	38	33	71	19
1	3	140.5	33.2	16.82	71.3	39	38	77	16
1	3	141	32	16.1	62.91	37	42	79	18
1	3	134.9	28.2	15.5	60.81	44	35	79	35
1	3	133.8	26.6	14.86	52.97	31	32	63	14
2	3	134.4	33.6	18.6	52.88	44	21	65	22
1	3	139.8	35.3	18.06	52.35	28	39	67	21
1	3	141.1	35.3	17.73	50.3	31	34	65	17
1	3	132.5	24.9	14.18	50.22	31	34	65	17
2	3	141.4	36.6	18.31	49.76	39	36	75	36
1	3	142.5	33.3	16.4	49.64	28	43	71	15
1	3	137.9	33.4	17.56	48.79	28	39	67	14
1	3	140.5	33.5	16.97	48.53	37	38	75	33
2	3	138.1	32.6	17.09	48.1	41	27	68	23
1	3	131.3	27.4	15.89	47.62	37	38	75	18
1	3	134.7	27.5	15.16	47.4	37	34	71	11
1	3	131.7	25.3	14.59	46.74	36	28	64	9
2	3	141.6	29	14.46	45.64	34	38	72	21
2	3	128.3	26.6	16.16	44.95	38	33	71	24
1	3	141.5	34.7	17.33	44.81	28	35	63	18
2	3	135.1	35.6	19.5	44.67	34	37	71	17
1	3	139.9	41.2	21.05	42.69	35	39	74	16
2	3	143.2	27.6	13.46	42.64	40	37	77	36
2	3	146.3	34.1	15.93	42.27	37	34	71	17
2	3	150.2	47.5	21.05	41.51	37	28	65	15
1	3	139.3	30.6	15.77	41.27	43	42	85	16
1	3	144.8	45.2	21.56	40.28	37	35	72	26
1	3	135.5	29.8	16.23	40	31	41	72	17
2	3	137.9	35.8	18.83	39.82	38	29	67	23
1	3	133.6	27.6	15.46	39.08	33	39	72	17
2	3	137.9	27.8	14.62	38.34	42	33	75	19
1	3	134.5	31.8	17.58	37.32	29	40	69	16
1	3	134.7	33.7	18.57	35.95	31	34	65	10
2	3	138.7	27.8	14.45	35.75	41	35	76	19
1	3	130.6	33.3	19.52	35.36	35	30	65	17
2	3	145.8	43.4	20.42	33.7	40	42	82	17
2	3	116.8	18.3	13.41	32.38	36	41	77	16
2	3	129.9	31.1	18.43	32.16	38	30	68	16
1	3	141.2	41	20.56	31.63	36	37	73	17
2	3	152.2	32.6	14.07	31.22	39	31	70	15
2	3	138.6	29.2	15.2	31.16	31	31	62	10
1	3	133.9	30.2	16.84	30.48	29	33	62	18
2	3	136.4	27.9	15	30.25	35	35	70	16
1	3	137.5	36.1	19.09	29.68	36	30	66	16
1	3	127.1	25.3	15.66	29.63	36	38	74	29
1	3	141.6	40	19.95	29.15	30	35	65	18
2	3	134.5	29.1	16.09	28.35	41	33	74	18
2	3	138.6	27.2	14.16	28.21	32	34	66	24
2	3	132	28.2	16.18	27.64	38	28	66	8
1	3	141.3	29.9	14.98	27.21	37	35	72	25
2	3	140	34.5	17.6	26.78	32	28	60	14
2	3	126	18.2	11.46	25.59	28	27	55	9
2	3	142.9	34	16.65	24.23	35	34	69	18
2	3	137.5	30.6	16.19	24.2	37	32	69	14
2	3	134.4	34.5	19.1	22.83	34	34	68	14
2	3	134	25	13.92	22.82	35	39	74	15
1	3	126.9	25.5	15.83	22.73	34	36	70	26
2	3	150.8	39	17.15	22.61	41	37	78	26
1	3	132.5	40.3	22.95	18.59	40	33	73	12
2	3	125.5	25.8	16.38	13.89	31	40	71	18
2	3	140.9	32.5	16.37	12.68	35	39	74	30
2	2	146.4	40.2	18.76	50.6	36	34	70	21
1	2	137.6	30.5	16.11	45.86	27	44	71	22
2	2	149.5	35.8	16.02	43.42	34	38	72	28
2	2	129.4	23.9	14.27	42.27	29	33	62	10
2	2	138.9	36.4	18.87	36.86	33	35	68	14
1	2	125.6	26.9	17.05	36.17	32	28	60	9
1	2	120.3	18.8	12.99	36.06	31	34	65	20
1	2	131.1	25.8	15.01	33.16	41	43	84	24
2	2	128.6	27.3	16.51	32.7	27	32	59	12
2	2	123.4	30.9	20.29	32.16	36	40	76	10
2	2	127.4	23.1	14.23	29.65	37	31	68	15
1	2	134.9	31.5	17.31	29.19	41	39	80	26
2	2	139.5	40.9	21.02	26.27	35	35	70	6
2	2	123.7	27.8	18.17	24.55	36	31	67	13
2	2	141.8	28.7	14.27	23.3	35	31	66	12
2	2	130.7	27.4	16.04	22.67	31	35	66	15
2	2	135.3	28.9	15.79	21.86	36	24	60	17
1	2	146	51.7	24.25	18.51	22	31	53	15
1	2	125.6	36.8	23.33	16.85	22	38	60	19
2	2	128.3	30.6	18.59	15.2	32	32	64	11
